# Supplementary material for: Probing the Informational and Regulatory Plasticity of a Transcription Factor DNA–Binding Domain
Source: PLoS Genet. 2012 Mar 29;8(3):e1002614. doi: 10.1371/journal.pgen.1002614 (PMC3315485; doi:10.1371/journal.pgen.1002614)
Supplement: Table S1 — Supporting data. Sheets 1 and 2: The measured associations () and free energies of binding ( ) of the five MarA variants to 64 different binding sites. Sheet 3: Binding sites for each mutant are ranked based on their of binding relative to the high affinity site. Sheet 4: The energy matrices used to create Figure 5. Sheet 5: The frequency matrices used to create Figure 7. Sheet 6: Kullback-Leibler Divergences between mutant binding matrices. (XLS) [file pgen.1002614.s003.xls]

## Sheet: Relative KA
Ka value calculated by MITOMI.							Ka value normalized so strongest site for each variant = 1.
DNA Seq	WQR	RQR	RTR	SAR	TRR		DNA Seq	WQR	RQR	RTR	SAR	TRR
AAA	2.35431e-05	4.60687e-06	0.000119102	0.00022902	6.44633e-05		AAA	0.12354	0.0424426	0.322946	0.852334	0.360255
GAA	5.6933e-05	2.25563e-05	8.4669e-05	0.000173639	7.73699e-05		GAA	0.298749	0.207809	0.229581	0.646224	0.432384
AAC	4.26917e-05	1.12344e-05	7.5274e-05	0.000208491	6.77738e-05		AAC	0.22402	0.103502	0.204106	0.775932	0.378756
GAC	3.7292e-05	1.15494e-05	5.68405e-05	0.000154005	0.000178938		GAC	0.195685	0.106403	0.154124	0.573152	1
AAG	4.88694e-05	1.02213e-05	7.51619e-05	0.000181907	6.04774e-05		AAG	0.256437	0.094168	0.203802	0.676997	0.33798
GAG	4.99384e-05	1.28902e-05	7.02577e-05	0.000136007	7.01027e-05		GAG	0.262046	0.118756	0.190505	0.506172	0.391771
AAT	4.0886e-05	9.87647e-06	7.90729e-05	0.000129357	5.52055e-05		AAT	0.214545	0.0909909	0.214407	0.481423	0.308518
GAT	4.27211e-05	1.21424e-05	7.43622e-05	0.000105722	6.53277e-05		GAT	0.224174	0.111867	0.201634	0.393461	0.365086
ACA	0.000135162	3.65735e-05	9.18583e-05	0.000171249	6.60758e-05		ACA	0.709244	0.336948	0.249075	0.637331	0.369267
GCA	0.000190571	7.01921e-05	0.000159315	0.000199054	7.00759e-05		GCA	1	0.646672	0.431985	0.74081	0.391622
ACC	6.08895e-05	7.61367e-05	0.000232337	0.000154006	6.78417e-05		ACC	0.319511	0.70144	0.629984	0.573159	0.379135
GCC	5.59066e-05	8.80014e-05	0.000368798	0.000148422	6.82973e-05		GCC	0.293363	0.810748	1	0.552375	0.381682
ACG	6.89179e-05	3.57822e-05	0.000141	0.000243101	5.39937e-05		ACG	0.361638	0.329657	0.382323	0.90474	0.301746
GCG	6.37106e-05	6.26242e-05	0.000252464	0.00026138	7.43447e-05		GCG	0.334314	0.576951	0.68456	0.972766	0.415477
ACT	7.20072e-05	6.36143e-05	0.000173106	0.000176481	6.83455e-05		ACT	0.37785	0.586072	0.46938	0.656803	0.381951
GCT	6.66986e-05	8.24116e-05	0.000333536	0.000176222	6.47775e-05		GCT	0.349993	0.759249	0.904388	0.655838	0.362011
AGA	5.84962e-05	1.06866e-05	8.43649e-05	0.000245421	6.47159e-05		AGA	0.306952	0.0984542	0.228757	0.913371	0.361667
GGA	6.48147e-05	1.47623e-05	-2.64217e-05	0.000133749	6.46779e-05		GGA	0.340108	0.136004		0.497767	0.361454
AGC	4.52065e-05	1.16324e-05	9.9533e-05	0.000268697	8.01828e-05		AGC	0.237216	0.107168	0.269885	1	0.448104
GGC	4.50418e-05	1.59849e-05	7.21813e-05	0.00015439	6.57857e-05		GGC	0.236352	0.147267	0.19572	0.574587	0.367645
AGG	5.39503e-05	1.12179e-05	7.80078e-05	0.000195124	8.50143e-05		AGG	0.283098	0.103349	0.211519	0.726183	0.475105
GGG	5.85554e-05	1.18961e-05	6.16705e-05	0.00011538	8.07231e-05		GGG	0.307262	0.109598	0.16722	0.429407	0.451123
AGT	4.55868e-05	1.48125e-05	6.37288e-05	0.000253757	7.98711e-05		AGT	0.239212	0.136466	0.172802	0.944398	0.446362
GGT	4.41379e-05	1.53084e-05	7.48643e-05	0.0001435	5.97474e-05		GGT	0.231608	0.141035	0.202996	0.534057	0.3339
ATA	5.32413e-05	1.17274e-05	7.68382e-05	0.000258413	8.90753e-05		ATA	0.279377	0.108043	0.208348	0.961726	0.4978
GTA	5.59813e-05	1.34838e-05	8.19455e-05	0.000214103	6.97908e-05		GTA	0.293755	0.124225	0.222196	0.79682	0.390028
ATC	4.18345e-05	1.27419e-05	6.43685e-05	0.000234303	8.34483e-05		ATC	0.219521	0.11739	0.174536	0.871997	0.466353
GTC	3.98068e-05	1.95551e-05	5.3763e-05	0.000263393	7.90893e-05		GTC	0.208882	0.180159	0.145779	0.980257	0.441993
ATG	6.07653e-05	1.15442e-05	8.97287e-05	0.000229553	7.23452e-05		ATG	0.318859	0.106356	0.243301	0.854318	0.404303
GTG	5.79546e-05	1.24642e-05	6.7438e-05	0.000210745	6.84337e-05		GTG	0.30411	0.114831	0.182859	0.784321	0.382444
ATT	5.03013e-05	1.32564e-05	7.68039e-05	0.000216729	8.09961e-05		ATT	0.26395	0.12213	0.208255	0.80659	0.452649
GTT	3.87688e-05	1.41462e-05	6.97797e-05	0.000216205	6.58913e-05		GTT	0.203435	0.130328	0.189209	0.804641	0.368235
CAA	6.9637e-05	1.5371e-05	6.93011e-05	0.000123765	8.95905e-05		CAA	0.365412	0.141612	0.187911	0.460609	0.50068
TAA	6.58016e-05	1.46747e-05	0.000189378	6.22681e-05	8.79676e-05		TAA	0.345286	0.135196	0.513501	0.23174	0.49161
CAC	4.97597e-05	1.4313e-05	7.43156e-05	0.000133599	8.0344e-05		CAC	0.261108	0.131864	0.201508	0.497209	0.449005
TAC	4.09628e-05	1.5398e-05	0.000364873	6.72102e-05	7.4548e-05		TAC	0.214948	0.14186	0.989358	0.250133	0.416614
CAG	5.58873e-05	1.13871e-05	5.50469e-05	9.58664e-05	8.52646e-05		CAG	0.293262	0.104909	0.14926	0.356782	0.476504
TAG	5.40736e-05	9.74196e-06	0.00025256	4.09661e-05	6.37912e-05		TAG	0.283745	0.0897517	0.684821	0.152462	0.356499
CAT	6.04566e-05	1.21404e-05	6.85189e-05	0.000120616	7.55346e-05		CAT	0.317239	0.111848	0.18579	0.448893	0.422127
TAT	5.36706e-05	1.30812e-05	0.000332688	5.94074e-05	7.73595e-05		TAT	0.28163	0.120516	0.902088	0.221094	0.432326
CCA	0.000123059	2.63534e-05	8.22038e-05	0.000101798	8.88707e-05		CCA	0.64574	0.242791	0.222897	0.378856	0.496657
TCA	7.23958e-05	8.88808e-05	0.000112705	8.12493e-05	8.24432e-05		TCA	0.379889	0.81885	0.305602	0.302382	0.460736
CCC	5.17772e-05	3.19478e-05	8.96919e-05	0.000132284	7.10818e-05		CCC	0.271695	0.294332	0.243201	0.492317	0.397243
TCC	3.4519e-05	0.000108543	0.000312595	6.24882e-05	7.14774e-05		TCC	0.181134	1	0.847606	0.23256	0.399454
CCG	7.89243e-05	2.12091e-05	9.03373e-05	0.000125705	0.000100308		CCG	0.414146	0.195397	0.244951	0.467831	0.560575
TCG	8.10945e-05	6.88782e-05	0.000130312	5.88108e-05	8.2804e-05		TCG	0.425534	0.634568	0.353344	0.218874	0.462753
CCT	8.66059e-05	2.52092e-05	8.66305e-05	0.000130681	8.48112e-05		CCT	0.454455	0.23225	0.2349	0.486349	0.47397
TCT	5.74294e-05	0.000103787	0.000236765	6.96795e-05	8.26117e-05		TCT	0.301354	0.956176	0.641991	0.259323	0.461678
CGA	7.04072e-05	1.60295e-05	8.86612e-05	0.000115487	0.000105387		CGA	0.369454	0.147678	0.240406	0.429803	0.588957
TGA	4.81728e-05	1.19776e-05	6.37481e-05	4.4301e-05	7.391e-05		TGA	0.252781	0.110348	0.172854	0.164873	0.413049
CGC	4.25642e-05	1.67001e-05	6.55938e-05	0.000161816	8.17212e-05		CGC	0.223351	0.153856	0.177859	0.602224	0.456701
TGC	4.6662e-05	1.45161e-05	7.42564e-05	6.35077e-05	7.28385e-05		TGC	0.244853	0.133736	0.201347	0.236354	0.40706
CGG	6.06277e-05	1.03171e-05	9.41015e-05	0.000101875	8.95586e-05		CGG	0.318137	0.0950507	0.255157	0.379145	0.500501
TGG	4.6199e-05	1.13795e-05	6.0949e-05	4.09212e-05	8.83042e-05		TGG	0.242424	0.104838	0.165264	0.152295	0.493491
CGT	4.96148e-05	1.56775e-05	5.65688e-05	0.000148298	7.77597e-05		CGT	0.260348	0.144435	0.153387	0.551914	0.434563
TGT	5.40525e-05	1.43506e-05	8.50297e-05	7.56573e-05	7.59492e-05		TGT	0.283634	0.13221	0.230559	0.28157	0.424444
CTA	6.90884e-05	1.26642e-05	0.000105218	0.000131847	0.000102124		CTA	0.362533	0.116674	0.285301	0.49069	0.570724
TTA	5.48164e-05	1.46386e-05	6.515e-05	5.42496e-05	9.27664e-05		TTA	0.287643	0.134864	0.176655	0.201899	0.518428
CTC	4.64927e-05	1.17766e-05	7.41594e-05	0.000147212	7.95693e-05		CTC	0.243965	0.108496	0.201084	0.547874	0.444675
TTC	3.74783e-05	1.73572e-05	7.64182e-05	6.82383e-05	8.03339e-05		TTC	0.196663	0.15991	0.207209	0.25396	0.448949
CTG	8.42229e-05	1.82917e-05	0	0.000140115	0.000105245		CTG	0.44195	0.16852		0.52146	0.588165
TTG	7.71715e-05	2.098e-05	0.000191012	5.13594e-05	0.000119053		TTG	0.404949	0.193287	0.517933	0.191142	0.665331
CTT	6.50003e-05	1.70747e-05	0.000266651	0.000136541	0.000103047		CTT	0.341081	0.157307	0.723028	0.508158	0.57588
TTT	4.12841e-05	2.31833e-05	0.000264002	5.6522e-05	9.64258e-05		TTT	0.216633	0.213586	0.715845	0.210356	0.538879

## Sheet: dG
dG calculated by (RT* LN(1/KA)) / 1000) in kJ / mol							ddG calculated by taking difference in dG between each site and the strongest site for that variant.
DNA Seq	WQR	RQR	RTR	SAR	TRR		DNA Seq	WQR	RQR	RTR	SAR	TRR
AAA	26.1384	30.1378	22.1621	20.5584	23.6679		AAA	5.12922	7.74934	2.77229	0.391895	2.50414
GAA	23.9725	26.2419	22.9991	21.2375	23.2202		GAA	2.96331	3.85341	3.60925	1.0709	2.0565
AAC	24.6786	27.9515	23.2876	20.7888	23.545		AAC	3.66939	5.56297	3.89773	0.622245	2.3813
GAC	25.0102	27.8837	23.9765	21.5318	21.1637		GAC	4.00107	5.49517	4.58668	1.36522	0
AAG	24.3471	28.1833	23.2912	21.1234	23.8244		AAG	3.33791	5.79477	3.90138	0.956797	2.66069
GAG	24.294	27.6143	23.4567	21.8366	23.4622		GAG	3.28484	5.22578	4.06688	1.67004	2.29843
AAT	24.7846	28.2674	23.1668	21.9596	24.0481		AAT	3.77539	5.87894	3.77696	1.79299	2.8844
GAT	24.6769	27.7608	23.3175	22.4544	23.6352		GAT	3.66771	5.37236	3.92762	2.28788	2.47147
ACA	21.8518	25.0565	22.7992	21.2714	23.6073		ACA	0.842662	2.66803	3.40935	1.10489	2.44354
GCA	21.0092	23.4576	21.4486	20.9024	23.4631		GCA	0	1.06914	2.05877	0.735859	2.29937
ACC	23.8077	23.2582	20.5232	21.5317	23.5426		ACC	2.79852	0.869752	1.13333	1.36519	2.37885
GCC	24.0171	22.903	19.3898	21.6223	23.5262		GCC	3.00794	0.514557	0	1.45579	2.36243
ACG	23.5039	25.1102	21.7482	20.4121	24.1026		ACG	2.49474	2.72169	2.35831	0.245541	2.93884
GCG	23.6966	23.7374	20.3194	20.2343	23.3181		GCG	2.68744	1.34894	0.929549	0.0677255	2.15433
ACT	23.3963	23.699	21.245	21.1976	23.5244		ACT	2.38718	1.31047	1.85513	1.03107	2.3607
GCT	23.5842	23.064	19.6363	21.2012	23.6559		GCT	2.57502	0.675516	0.246495	1.03468	2.49221
AGA	23.906	28.0741	23.0079	20.3888	23.6583		AGA	2.89688	5.6856	3.61807	0.222253	2.49454
GGA	23.6545	27.2817		21.8777	23.6597		GGA	2.64529	4.89318		1.71111	2.49598
AGC	24.5382	27.8661	22.6024	20.1666	23.1326		AGC	3.52901	5.47759	3.21254	0	1.96891
GGC	24.5471	27.0865	23.3905	21.5256	23.6181		GGC	3.53796	4.69803	4.00063	1.35909	2.45433
AGG	24.1045	27.9551	23.2001	20.9513	22.9891		AGG	3.0953	5.56659	3.81023	0.78477	1.8254
GGG	23.9036	27.8111	23.7765	22.24	23.1162		GGG	2.8944	5.42261	4.38664	2.07345	1.95244
AGT	24.5176	27.2733	23.696	20.3069	23.1422		AGT	3.50846	4.88485	4.30611	0.140318	1.97846
GGT	24.5968	27.1926	23.301	21.7051	23.8542		GGT	3.58768	4.80408	3.91111	1.5385	2.69047
ATA	24.1369	27.8461	23.2371	20.2623	22.8747		ATA	3.12775	5.45765	3.84728	0.095722	1.71095
GTA	24.0138	27.5038	23.0793	20.7236	23.4731		GTA	3.00466	5.11536	3.68944	0.55709	2.30937
ATC	24.7283	27.6426	23.6715	20.5025	23.0347		ATC	3.71915	5.25416	4.28161	0.335954	1.871
GTC	24.8502	26.5921	24.1131	20.2155	23.1663		GTC	3.84101	4.2036	4.72321	0.0489085	2.00259
ATG	23.8127	27.8847	22.8567	20.5527	23.3849		ATG	2.80353	5.49626	3.46689	0.386194	2.2212
GTG	23.9289	27.6967	23.5572	20.7624	23.5213		GTG	2.91969	5.30821	4.16735	0.595868	2.35754
ATT	24.2762	27.5456	23.2382	20.6938	23.1079		ATT	3.26708	5.15707	3.84838	0.527197	1.94416
GTT	24.915	27.3862	23.4735	20.6997	23.6141		GTT	3.90581	4.99774	4.08363	0.533131	2.4504
CAA	23.4784	27.1826	23.4904	22.068	22.8605		CAA	2.46928	4.79407	4.10051	1.9014	1.6968
TAA	23.6174	27.2963	21.0246	23.7528	22.9054		TAA	2.60823	4.90778	1.63478	3.58629	1.74164
CAC	24.3028	27.3575	23.319	21.8804	23.1277		CAC	3.29363	4.96899	3.92916	1.71386	1.96398
TAC	24.78	27.1783	19.4161	23.5655	23.3114		TAC	3.77079	4.78977	0.0262427	3.39895	2.14763
CAG	24.0179	27.9183	24.0552	22.6945	22.9819		CAG	3.00878	5.52986	4.66532	2.5279	1.81819
TAG	24.0989	28.3011	20.3185	24.7798	23.6936		TAG	3.0897	5.91258	0.928613	4.61327	2.52984
CAT	23.8252	27.7613	23.5182	22.1312	23.2791		CAT	2.81602	5.37276	4.12835	1.9646	2.11539
TAT	24.1172	27.5782	19.6426	23.8682	23.2206		TAT	3.10805	5.18971	0.252741	3.70164	2.05683
CCA	22.0819	25.8603	23.0716	22.5472	22.8803		CCA	1.07274	3.47183	3.68172	2.38066	1.71659
TCA	23.3831	22.8787	22.2976	23.1002	23.0645		TCA	2.37398	0.490168	2.90769	2.93367	1.90072
CCC	24.2053	25.3882	22.8578	21.9047	23.4281		CCC	3.19615	2.99968	3.46789	1.73811	2.26441
TCC	25.1998	22.3885	19.7954	23.7442	23.4145		TCC	4.1906	0	0.405538	3.57763	2.2508
CCG	23.1714	26.393	22.8402	22.0298	22.5834		CCG	2.16221	4.00446	3.4503	1.86324	1.41965
TCG	23.1048	23.504	21.9415	23.893	23.0537		TCG	2.09567	1.11548	2.55165	3.7264	1.89001
CCT	22.9436	25.9692	22.9429	21.9346	22.995		CCT	1.93439	3.5807	3.55307	1.76803	1.83127
TCT	23.9512	22.4984	20.4769	23.477	23.0594		TCT	2.94202	0.10991	1.08702	3.31045	1.89571
CGA	23.4515	27.0797	22.8861	22.2377	22.4622		CGA	2.4423	4.69119	3.49624	2.07119	1.2985
TGA	24.3823	27.7944	23.6952	24.5879	23.3324		TGA	3.37313	5.40588	4.30537	4.42131	2.16871
CGC	24.6859	26.9792	23.6252	21.4104	23.086		CGC	3.67673	4.59068	4.23536	1.24386	1.9223
TGC	24.4604	27.3229	23.321	23.7045	23.3683		TGC	3.45128	4.93442	3.93111	3.53793	2.20453
CGG	23.8182	28.1604	22.74	22.5453	22.8614		CGG	2.80909	5.77188	3.35018	2.37879	1.69767
TGG	24.4849	27.92	23.8054	24.7825	22.896		TGG	3.47574	5.53151	4.4155	4.61596	1.73227
CGT	24.3099	27.1341	23.9883	21.6244	23.2079		CGT	3.30078	4.74566	4.59843	1.45784	2.04418
TGT	24.0998	27.351	22.9887	23.2751	23.2657		TGT	3.09066	4.96256	3.59882	3.10857	2.10196
CTA	23.4978	27.6576	22.4661	21.9128	22.5394		CTA	2.48867	5.26916	3.07629	1.74623	1.37564
TTA	24.0654	27.3023	23.6419	24.091	22.7751		TTA	3.05624	4.91381	4.25201	3.92441	1.61136
CTC	24.4694	27.8359	23.3242	21.6424	23.1515		CTC	3.46019	5.44739	3.93432	1.47586	1.98775
TTC	24.998	26.8845	23.2506	23.5283	23.128		TTC	3.98885	4.49602	3.86072	3.36172	1.96429
CTG	23.012	26.7559		21.7636	22.4655		CTG	2.00283	4.36741		1.59705	1.3018
TTG	23.2264	26.4196	21.0036	24.2253	22.1632		TTG	2.21729	4.03109	1.6137	4.05869	0.999433
CTT	23.6474	26.9248	20.1853	21.827	22.5173		CTT	2.63828	4.53627	0.79545	1.66043	1.35358
TTT	24.7608	26.1747	20.2098	23.9903	22.6802		TTT	3.75163	3.78617	0.81994	3.82376	1.51646

## Sheet: ddG Rank
All sites ranked based on ddG for each variant
Rank	DNA Seq	WQR		Rank	DNA Seq	RQR		Rank	DNA Seq	RTR		Rank	DNA Seq	SAR		Rank	DNA Seq	TRR
1	GCA	0		1	TCC	0		1	GCC	0		1	AGC	0		1	GAC	0
2	ACA	0.842662		2	TCT	0.10991		2	TAC	0.0262427		2	GTC	0.0489085		2	TTG	0.999433
3	CCA	1.07274		3	TCA	0.490168		3	GCT	0.246495		3	GCG	0.0677255		3	CGA	1.2985
4	CCT	1.93439		4	GCC	0.514557		4	TAT	0.252741		4	ATA	0.095722		4	CTG	1.3018
5	CTG	2.00283		5	GCT	0.675516		5	TCC	0.405538		5	AGT	0.140318		5	CTT	1.35358
6	TCG	2.09567		6	ACC	0.869752		6	CTT	0.79545		6	AGA	0.222253		6	CTA	1.37564
7	CCG	2.16221		7	GCA	1.06914		7	TTT	0.81994		7	ACG	0.245541		7	CCG	1.41965
8	TTG	2.21729		8	TCG	1.11548		8	TAG	0.928613		8	ATC	0.335954		8	TTT	1.51646
9	TCA	2.37398		9	ACT	1.31047		9	GCG	0.929549		9	ATG	0.386194		9	TTA	1.61136
10	ACT	2.38718		10	GCG	1.34894		10	TCT	1.08702		10	AAA	0.391895		10	CAA	1.6968
11	CGA	2.4423		11	ACA	2.66803		11	ACC	1.13333		11	ATT	0.527197		11	CGG	1.69767
12	CAA	2.46928		12	ACG	2.72169		12	TTG	1.6137		12	GTT	0.533131		12	ATA	1.71095
13	CTA	2.48867		13	CCC	2.99968		13	TAA	1.63478		13	GTA	0.55709		13	CCA	1.71659
14	ACG	2.49474		14	CCA	3.47183		14	ACT	1.85513		14	GTG	0.595868		14	TGG	1.73227
15	GCT	2.57502		15	CCT	3.5807		15	GCA	2.05877		15	AAC	0.622245		15	TAA	1.74164
16	TAA	2.60823		16	TTT	3.78617		16	ACG	2.35831		16	GCA	0.735859		16	CAG	1.81819
17	CTT	2.63828		17	GAA	3.85341		17	TCG	2.55165		17	AGG	0.78477		17	AGG	1.8254
18	GGA	2.64529		18	CCG	4.00446		18	AAA	2.77229		18	AAG	0.956797		18	CCT	1.83127
19	GCG	2.68744		19	TTG	4.03109		19	TCA	2.90769		19	ACT	1.03107		19	ATC	1.871
20	ACC	2.79852		20	GTC	4.2036		20	CTA	3.07629		20	GCT	1.03468		20	TCG	1.89001
21	ATG	2.80353		21	CTG	4.36741		21	AGC	3.21254		21	GAA	1.0709		21	TCT	1.89571
22	CGG	2.80909		22	TTC	4.49602		22	CGG	3.35018		22	ACA	1.10489		22	TCA	1.90072
23	CAT	2.81602		23	CTT	4.53627		23	ACA	3.40935		23	CGC	1.24386		23	CGC	1.9223
24	GGG	2.8944		24	CGC	4.59068		24	CCG	3.4503		24	GGC	1.35909		24	ATT	1.94416
25	AGA	2.89688		25	CGA	4.69119		25	ATG	3.46689		25	ACC	1.36519		25	GGG	1.95244
26	GTG	2.91969		26	GGC	4.69803		26	CCC	3.46789		26	GAC	1.36522		26	CAC	1.96398
27	TCT	2.94202		27	CGT	4.74566		27	CGA	3.49624		27	GCC	1.45579		27	TTC	1.96429
28	GAA	2.96331		28	TAC	4.78977		28	CCT	3.55307		28	CGT	1.45784		28	AGC	1.96891
29	GTA	3.00466		29	CAA	4.79407		29	TGT	3.59882		29	CTC	1.47586		29	AGT	1.97846
30	GCC	3.00794		30	GGT	4.80408		30	GAA	3.60925		30	GGT	1.5385		30	CTC	1.98775
31	CAG	3.00878		31	AGT	4.88485		31	AGA	3.61807		31	CTG	1.59705		31	GTC	2.00259
32	TTA	3.05624		32	GGA	4.89318		32	CCA	3.68172		32	CTT	1.66043		32	CGT	2.04418
33	TAG	3.0897		33	TAA	4.90778		33	GTA	3.68944		33	GAG	1.67004		33	GAA	2.0565
34	TGT	3.09066		34	TTA	4.91381		34	AAT	3.77696		34	GGA	1.71111		34	TAT	2.05683
35	AGG	3.0953		35	TGC	4.93442		35	AGG	3.81023		35	CAC	1.71386		35	TGT	2.10196
36	TAT	3.10805		36	TGT	4.96256		36	ATA	3.84728		36	CCC	1.73811		36	CAT	2.11539
37	ATA	3.12775		37	CAC	4.96899		37	ATT	3.84838		37	CTA	1.74623		37	TAC	2.14763
38	CCC	3.19615		38	GTT	4.99774		38	TTC	3.86072		38	CCT	1.76803		38	GCG	2.15433
39	ATT	3.26708		39	GTA	5.11536		39	AAC	3.89773		39	AAT	1.79299		39	TGA	2.16871
40	GAG	3.28484		40	ATT	5.15707		40	AAG	3.90138		40	CCG	1.86324		40	TGC	2.20453
41	CAC	3.29363		41	TAT	5.18971		41	GGT	3.91111		41	CAA	1.9014		41	ATG	2.2212
42	CGT	3.30078		42	GAG	5.22578		42	GAT	3.92762		42	CAT	1.9646		42	TCC	2.2508
43	AAG	3.33791		43	ATC	5.25416		43	CAC	3.92916		43	CGA	2.07119		43	CCC	2.26441
44	TGA	3.37313		44	CTA	5.26916		44	TGC	3.93111		44	GGG	2.07345		44	GAG	2.29843
45	TGC	3.45128		45	GTG	5.30821		45	CTC	3.93432		45	GAT	2.28788		45	GCA	2.29937
46	CTC	3.46019		46	GAT	5.37236		46	GGC	4.00063		46	CGG	2.37879		46	GTA	2.30937
47	TGG	3.47574		47	CAT	5.37276		47	GAG	4.06688		47	CCA	2.38066		47	GTG	2.35754
48	AGT	3.50846		48	TGA	5.40588		48	GTT	4.08363		48	CAG	2.5279		48	ACT	2.3607
49	AGC	3.52901		49	GGG	5.42261		49	CAA	4.10051		49	TCA	2.93367		49	GCC	2.36243
50	GGC	3.53796		50	CTC	5.44739		50	CAT	4.12835		50	TGT	3.10857		50	ACC	2.37885
51	GGT	3.58768		51	ATA	5.45765		51	GTG	4.16735		51	TCT	3.31045		51	AAC	2.3813
52	GAT	3.66771		52	AGC	5.47759		52	CGC	4.23536		52	TTC	3.36172		52	ACA	2.44354
53	AAC	3.66939		53	GAC	5.49517		53	TTA	4.25201		53	TAC	3.39895		53	GTT	2.4504
54	CGC	3.67673		54	ATG	5.49626		54	ATC	4.28161		54	TGC	3.53793		54	GGC	2.45433
55	ATC	3.71915		55	CAG	5.52986		55	TGA	4.30537		55	TCC	3.57763		55	GAT	2.47147
56	TTT	3.75163		56	TGG	5.53151		56	AGT	4.30611		56	TAA	3.58629		56	GCT	2.49221
57	TAC	3.77079		57	AAC	5.56297		57	GGG	4.38664		57	TAT	3.70164		57	AGA	2.49454
58	AAT	3.77539		58	AGG	5.56659		58	TGG	4.4155		58	TCG	3.7264		58	GGA	2.49598
59	GTC	3.84101		59	AGA	5.6856		59	GAC	4.58668		59	TTT	3.82376		59	AAA	2.50414
60	GTT	3.90581		60	CGG	5.77188		60	CGT	4.59843		60	TTA	3.92441		60	TAG	2.52984
61	TTC	3.98885		61	AAG	5.79477		61	CAG	4.66532		61	TTG	4.05869		61	AAG	2.66069
62	GAC	4.00107		62	AAT	5.87894		62	GTC	4.72321		62	TGA	4.42131		62	GGT	2.69047
63	TCC	4.1906		63	TAG	5.91258		63	GGA			63	TAG	4.61327		63	AAT	2.8844
64	AAA	5.12922		64	AAA	7.74934		64	CTG			64	TGG	4.61596		64	ACG	2.93884

## Sheet: energy matrices
ddG Matrix
For WQR relative to GCA
Position	-2	-1	0
A	0.842662	2.96331	0
C	1.07274	0	4.00107
G	0	2.64529	3.28484
T	2.37398	3.00466	3.66771
ddG Matrix
For RQR relative to TCC
Position	-2	-1	0
A	0.869804	4.79006	0.490198
C	2.99986	0	0
G	0.514588	4.93472	1.11555
T	0	4.49629	0.109917
ddG Matrix
For RTR relative to GCC
Position	-2	-1	0
A	1.13333	4.58668	2.05877
C	3.46789	0	0
G	0	4.00063	0.929549
T	0.405538	4.72321	0.246495
ddG Matrix
For SAR relative to AGC
Position	-2	-1	0
A	0	0.622245	0.222253
C	1.24386	1.36519	0
G	1.35909	0	0.78477
T	3.53793	0.335954	0.140318
ddG Matrix
For TRR relative to GAC
Position	-2	-1	0
A	2.3813	0	2.0565
C	1.96398	2.36243	0
G	0	2.45433	2.29843
T	2.14763	2.00259	2.47147

## Sheet: in vivo bs matrices
Frequency matrices from in vivo binding site selection
WQR
Position	-5	-4	-3	-2	-1	0	1
A	0.45	0	0	0	0	0.19	0.15
C	0.13	0	0	0	0.95	0.32	0.43
G	0.4	0	1	0.85	0.05	0.42	0.09
T	0.02	1	0	0.15	0	0.07	0.33
RQR
Position	-5	-4	-3	-2	-1	0	1
A	0.32	0	0	0.17	0	0.25	0.16
C	0.23	0	0	0.12	1	0.4	0.45
G	0.35	0	1	0.36	0	0.21	0.16
T	0.1	1	0	0.35	0	0.14	0.22
RTR
Position	-5	-4	-3	-2	-1	0	1
A	0.36	0	0	0.06	0	0.21	0.11
C	0.25	0	0	0.06	1	0.32	0.52
G	0	0	1	0.58	0	0.17	0.26
T	0.39	1	0	0.31	0	0.3	0.11
SAR
Position	-5	-4	-3	-2	-1	0	1
A	0.99	0	0	0.82	0	0	0.05
C	0	0	0	0	0	1	0.05
G	0.01	0	1	0.18	0.14	0	0.91
T	0	1	0	0	0.86	0	0
TRR
Position	-5	-4	-3	-2	-1	0	1
A	1	0	0	0	1	0	0
C	0	0	0	0	0	1	1
G	0	0	1	1	0	0	0
T	0	1	0	0	0	0	0

## Sheet: Kullback-Leibler Divergences
All pair-wise MITOMI based binding matrices Kullback-Leibler Divergences
	WQR	RQR	RTR	SAR	TRR
WQR	0	1.53	2	2.13	3.04
RQR	1.53	0	0.15	2.53	2.77
RTR	2	0.15	0	2.47	2.42
SAR	2.13	2.53	2.47	0	1.56
TRR	3.04	2.77	2.42	1.56	0
All pair-wise in vivo binding site matrices Kullback-Leibler Divergences
	WQR	RQR	RTR	SAR	TRR
WQR	0	0.62	0.38	6.2	4.77
RQR	0.62	0	0.14	5.28	5.44
RTR	0.38	0.14	0	5.76	5.2
SAR	6.2	5.28	5.76	0	5.2
TRR	4.77	5.44	5.2	5.2	0
Kullback-Leibler Divergences between corresponding MITOMI and in vivo matrices
WQR	1.67
RQR	0.15
RTR	0.15
SAR	2.01
TRR	0.72
